# Supplementary material
Source: HighWire-hosted journal article supplement (https://bmjopen.bmj.com/content/14/4/e078390)
Supplement: inline-supplementary-material-1 [file inline-supplementary-material-1.pdf]

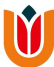

**Manuscript – Social care data and its fitness for integrated health and social care service governance:  
an exploratory qualitative analysis in the Dutch context**

Véronique LLC Bos<sup>1,2</sup>, Niek S Klazinga<sup>1,2</sup> and Dionne S Kringos<sup>1,2</sup>

<sup>1</sup> Department of Public and Occupational Health, Amsterdam UMC Location University of Amsterdam, Meibergdreef 9, Amsterdam, The Netherlands.

<sup>2</sup> Quality of Care, Amsterdam Public Health research institute, Amsterdam, The Netherlands.

**Corresponding author**

Véronique Bos

Department of Public and Occupational Health, Amsterdam UMC, University of Amsterdam

Van der Boechorststraat 7, 1081 BT Amsterdam, the Netherlands

Email: v.l.bos@amsterdamumc.nl

**Supplemental Material 1 COREQ 32-item checklist**

**Domain 1: Research team and reflexivity**

*Personal Characteristics*

| Nr | Item                    | Guide question/description                             | Answer and where to find in manuscript                                                                            |
|----|-------------------------|--------------------------------------------------------|-------------------------------------------------------------------------------------------------------------------|
| 1  | Interviewer/facilitator | Which author/s conducted the interview or focus group? | Interviews: VB<br><br>Reflection session: NK, DK and VB<br><br>Contributorship statement page 19                  |
| 2  | Credentials             | What were the researcher’s credentials? E.g. PhD, MD   | VB: BSc, MA<br><br>NK: Full Professor, MD<br><br>DK: Associate Professor<br><br>Contributorship statement page 19 |
| 3  | Occupation              | What was their occupation at the time of the study?    | VB: PhD candidate<br><br>NK: Professor of Social Medicine                                                         |

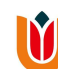

|   |                         |                                                      |                                                                                                                  |
|---|-------------------------|------------------------------------------------------|------------------------------------------------------------------------------------------------------------------|
|   |                         |                                                      | DK: Associate Professor and Principal Investigator & Educator<br><br>Contributorship statement page 19           |
| 4 | Gender                  | Was the researcher male or female?                   | VB: female<br><br>NK: male<br><br>DK: female<br><br>Contributorship statement page 19                            |
| 5 | Experience and training | What experience or training did the researcher have? | Experienced in interviews, reflection sessions and qualitative research<br><br>Contributorship statement page 19 |

#### Relationship with participants

| Nr | Item                                     | Guide question/description                                                                                                                |                                                                                                                                                                                |
|----|------------------------------------------|-------------------------------------------------------------------------------------------------------------------------------------------|--------------------------------------------------------------------------------------------------------------------------------------------------------------------------------|
| 6  | Relationship established                 | Was a relationship established prior to study commencement?                                                                               | Before the start of the study, the study and the research team were introduced to the interviewees and reflection session experts via email.<br><br>Research Methods pages 7-8 |
| 7  | Participant knowledge of the interviewer | What did the participants know about the researcher? e.g. personal goals, reasons for doing the research                                  | In the communication to participants the background of the interviewer was listed, as well as research goals.<br><br>Research Methods pages 7-8                                |
| 8  | Interviewer characteristics              | What characteristics were reported about the interviewer/facilitator? e.g. Bias, assumptions, reasons and interests in the research topic | The credentials, occupation and department of the research team was communicated.<br><br>Research Methods pages 7-8                                                            |

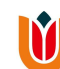

## Domain 2: study design

### Theoretical framework

| Nr | Item                                  | Guide question/description                                                                                                                               |                                                                                                         |
|----|---------------------------------------|----------------------------------------------------------------------------------------------------------------------------------------------------------|---------------------------------------------------------------------------------------------------------|
| 9  | Methodological orientation and Theory | What methodological orientation was stated to underpin the study? e.g. grounded theory, discourse analysis, ethnography, phenomenology, content analysis | A constructivism explorative approach with inductive reasoning was used.<br><br>Research Methods page 6 |

### Participant selection

| Nr | Item               | Guide question/description                                                         |                                                                                                                                                                      |
|----|--------------------|------------------------------------------------------------------------------------|----------------------------------------------------------------------------------------------------------------------------------------------------------------------|
| 10 | Sampling           | How were participants selected? e.g. purposive, convenience, consecutive, snowball | Purposive sampling based on the desktop research and participant referral<br><br>Research Methods page 7                                                             |
| 11 | Method of approach | How were participants approached? e.g. face-to-face, telephone, mail, email        | The participants were approached via email, phone and LinkedIn.<br><br>Research Methods page 7                                                                       |
| 12 | Sample size        | How many participants were in the study?                                           | 18 participants in the interviews, and 10 participants in the reflection session.<br><br>Results page 9                                                              |
| 13 | Non-participation  | How many people refused to participate or dropped out? Reasons?                    | 3 participants dropped out without stating a reason, 1 participant refused to participate due to prioritisation issues at that moment<br><br>Research Methods page 7 |

### Setting

| Nr | Item                       | Guide question/description                                 |                                                                                         |
|----|----------------------------|------------------------------------------------------------|-----------------------------------------------------------------------------------------|
| 14 | Setting of data collection | Where was the data collected? e.g. home, clinic, workplace | Most interviews were conducted digitally or in the work environment of the interviewee. |



|    |                              |                                                                                   |                                                                                                                                                                                                                                 |
|----|------------------------------|-----------------------------------------------------------------------------------|---------------------------------------------------------------------------------------------------------------------------------------------------------------------------------------------------------------------------------|
|    |                              |                                                                                   | The reflection session was held digitally.<br><br>Research Methods page 7                                                                                                                                                       |
| 15 | Presence of non-participants | Was anyone else present besides the participants and researchers?                 | No<br><br>Contributorship statement page 19                                                                                                                                                                                     |
| 16 | Description of sample        | What are the important characteristics of the sample? e.g. demographic data, date | Participants from different levels of the health care system (micro, meso, macro) and different perspectives (clients, providers, data processors, policy advisors) were included in the sample.<br><br>Research Methods page 7 |

#### Data collection

| Nr | Item                   | Guide question/description                                                    |                                                                                                                                                                                                   |
|----|------------------------|-------------------------------------------------------------------------------|---------------------------------------------------------------------------------------------------------------------------------------------------------------------------------------------------|
| 17 | Interview guide        | Were questions, prompts, guides provided by the authors? Was it pilot tested? | The interview guideline was grounded in the Health care performance intelligence pyramid and is provided in appendix 3. It was not pilot tested.<br><br>Research Methods page 7                   |
| 18 | Repeat interviews      | Were repeat interviews carried out? If yes, how many?                         | No, however some questions that could not be answered during interviews were answered at a later moment in time or corrected in the transcript by the interviewee.<br><br>Research Methods page 8 |
| 19 | Audio/visual recording | Did the research use audio or visual recording to collect the data?           | Interviews and the reflection session were audio recorded<br><br>Research Methods page 8                                                                                                          |



|    |                      |                                                                          |                                                                                                                                                                                                      |
|----|----------------------|--------------------------------------------------------------------------|------------------------------------------------------------------------------------------------------------------------------------------------------------------------------------------------------|
| 20 | Field notes          | Were field notes made during and/or after the interview or focus group?  | Notes were taken by two researchers (VB and DK) during the reflection session.<br><br>Contributor statement page 19                                                                                  |
| 21 | Duration             | What was the duration of the interviews or focus group?                  | The duration of the interviews were between 33-60 minutes.<br><br>Research Methods page 7                                                                                                            |
| 22 | Data saturation      | Was data saturation discussed?                                           | Participants could adjust content to their transcript without limitations and the reflection had the function to validate and if needed complement draft findings.<br><br>Research Methods pages 7-8 |
| 23 | Transcripts returned | Were transcripts returned to participants for comment and/or correction? | Transcripts were emailed to the participants and they were given at least two weeks to review and adjust content to their transcript without limitations.<br><br>Results page 8                      |

### Domain 3: analysis and findings

#### Data analysis

| Nr | Item                           | Guide question/description                            |                                                                                                                                                                   |
|----|--------------------------------|-------------------------------------------------------|-------------------------------------------------------------------------------------------------------------------------------------------------------------------|
| 24 | Number of data coders          | How many data coders coded the data?                  | One researcher VB drafted the results and the reflection session was used to complement and validate principle findings.<br><br>Contributorship statement page 19 |
| 25 | Description of the coding tree | Did authors provide a description of the coding tree? | No, a reflection session with experts was used to validate principle findings.<br><br>Research Methods page 8                                                     |

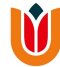

|    |                      |                                                             |                                                                                                                                                           |
|----|----------------------|-------------------------------------------------------------|-----------------------------------------------------------------------------------------------------------------------------------------------------------|
| 26 | Derivation of themes | Were themes identified in advance or derived from the data? | The transcript pieces were ordered by research question and themes were identified from these grouped transcript pieces.<br><br>Research Methods page 8-9 |
| 27 | Software             | What software, if applicable, was used to manage the data?  | Excel was used to order and theme the transcript pieces.<br><br>Research Methods page 8                                                                   |
| 28 | Participant checking | Did participants provide feedback on the findings?          | Yes, the reflection session was used to complement and validate draft findings.<br><br>Research Methods page 8                                            |

#### Reporting

| Nr | Item                         | Guide question/description                                                                                                        |                                                                                                                                                       |
|----|------------------------------|-----------------------------------------------------------------------------------------------------------------------------------|-------------------------------------------------------------------------------------------------------------------------------------------------------|
| 29 | Quotations presented         | Were participant quotations presented to illustrate the themes / findings? Was each quotation identified? e.g. participant number | One quote was used anonymously in the article and can be retraced by the researchers via the transcript identification number.<br><br>Results page 15 |
| 30 | Data and findings consistent | Was there consistency between the data presented and the findings?                                                                | Yes, no contradicting statements were made in the interviews.<br><br>Results pages 9-16                                                               |
| 31 | Clarity of major themes      | Were major themes clearly presented in the findings?                                                                              | There was overall consensus in the reflection session on the final principal findings.<br><br>Results pages 9-16                                      |
| 32 | Clarity of minor themes      | Is there a description of diverse cases or discussion of minor themes?                                                            | In the reflection session examples were added to some statements to highlight nuances.<br><br>Results pages 9-16                                      |
