# Supplementary material
Source: HighWire-hosted journal article supplement (https://bmjopen.bmj.com/content/14/4/e078390)
Supplement: inline-supplementary-material-4 [file inline-supplementary-material-4.pdf]

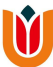

**Manuscript – Social care data and its fitness for integrated health and social care service governance:  
an exploratory qualitative analysis in the Dutch context**

Véronique LLC Bos<sup>1,2</sup>, Niek S Klazinga<sup>1,2</sup> and Dionne S Kringos<sup>1,2</sup>

<sup>1</sup> Department of Public and Occupational Health, Amsterdam UMC Location University of Amsterdam, Meibergdreef 9, Amsterdam, The Netherlands.

<sup>2</sup> Quality of Care, Amsterdam Public Health research institute, Amsterdam, The Netherlands.

**Corresponding author**

Véronique Bos

Department of Public and Occupational Health, Amsterdam UMC, University of Amsterdam

Van der Boechorststraat 7, 1081 BT Amsterdam, the Netherlands

Email: v.l.bos@amsterdamumc.nl

**Supplemental Material 4 Interviewee list with background/expertise**

| organization                    | WHY?                                                                                                                                                                               |
|---------------------------------|------------------------------------------------------------------------------------------------------------------------------------------------------------------------------------|
| VNG GMSD                        | Custodian of the Municipal Monitor of the Social Domain Dashboard and data.                                                                                                        |
| VNG<br>voorspelmodel            | Custodian of the Social Care Act (WMO) prediction model                                                                                                                            |
| Divosa                          | Knowledge organisation supporting municipalities                                                                                                                                   |
| Municipality of<br>Amsterdam    | Data team of the municipality                                                                                                                                                      |
| Stichting<br>Inlichtingenbureau | Data processing service organisation established by the Ministry of Social Affairs and Employment (SZW) processing data about citizens who use social care schemes and facilities. |
| Vektis                          | Custodian of the Gemeentezorgspiegel (municipal care dashboard)                                                                                                                    |
| De Friesland                    | Health care insurer in the Friesland region working on integrated care projects using data.                                                                                        |
| RIVM (Regiobeeld)               | Custodian of Regiobeeld                                                                                                                                                            |

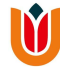

|                                  |                                                                                                                                                                                                                                                  |
|----------------------------------|--------------------------------------------------------------------------------------------------------------------------------------------------------------------------------------------------------------------------------------------------|
| Sociaal Werk<br>Versterkt        | Representative of social workers                                                                                                                                                                                                                 |
| De Sociale<br>Maatschap          | Social care provider in de Amsterdam Noord region                                                                                                                                                                                                |
| Ketenbureau i-<br>sociaal Domein | Data processing service organisation which facilitates and supports municipalities and healthcare providers in, among other things, simplifying the process from purchasing and tendering to accountability and reducing administrative burdens. |
| ZorgInstituut                    | Custodians of the i-standards (e.g. i_WMO standard)                                                                                                                                                                                              |
| BKR                              | Custodian credit registry (BKR)                                                                                                                                                                                                                  |
| LCR                              | National representatives for clients in social care                                                                                                                                                                                              |
